# Supplementary material
Source: PubMed Central journal article supplement (PMC2567513)
Supplement: 0806324105_ST2.pdf [file 0806324105_ST2.pdf]

Table S2. Summary of the small molecules analyzed in this work

| Structure                                                                           | ID no.<br>in Chembridge | Short name      |
|-------------------------------------------------------------------------------------|-------------------------|-----------------|
| 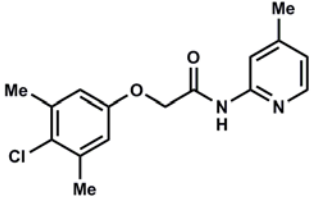   | 6027864                 | <b>602</b>      |
|    | 5336619                 | <b>533</b>      |
|    | 5353053                 | <b>5353</b>     |
|    | 5265305                 | <b>5265</b>     |
|   |                         | <b>2,4-D</b>    |
|  | 5617690                 | <b>602-UC</b>   |
|  |                         | <b>picloram</b> |
|  | 1683-6359*              | <b>1683</b>     |
|  | 5358476                 | <b>5358</b>     |
