# Supplementary material
Source: PubMed Central journal article supplement (PMC2567513)
Supplement: 0806324105_ST4.pdf [file 0806324105_ST4.pdf]

Table S4. Detailed physiochemical properties of auxins in their free acid form

| Short Name         | IAA                                                                               | 2,4-D                                                                             | 602-UC                                                                             | Picloram                                                                            | NAA                                                                                 |
|--------------------|-----------------------------------------------------------------------------------|-----------------------------------------------------------------------------------|------------------------------------------------------------------------------------|-------------------------------------------------------------------------------------|-------------------------------------------------------------------------------------|
| Chembridge ID      |                                                                                   |                                                                                   | 5617690                                                                            |                                                                                     |                                                                                     |
| Structure          | 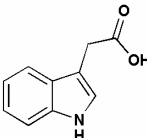 |  |  |  |  |
| IUPAC Name         | 2-(1H-indol-3-yl)acetic acid                                                      | 2-(2,4-dichlorophenoxy)acetic acid                                                | 2-(4-chloro-3,5-dimethylphenoxy)acetic acid                                        | 4-amino-3,5,6-trichloropyridine-2-carboxylic acid                                   | 2-(naphthalen-5-yl)acetic acid                                                      |
| MW                 | 175.18                                                                            | 221.04                                                                            | 214.65                                                                             | 241.46                                                                              |                                                                                     |
| Formula            | C <sub>10</sub> H <sub>9</sub> NO <sub>2</sub>                                    | C <sub>8</sub> H <sub>6</sub> Cl <sub>2</sub> O <sub>3</sub>                      | C <sub>10</sub> H <sub>11</sub> ClO <sub>3</sub>                                   | C <sub>6</sub> H <sub>3</sub> Cl <sub>3</sub> N <sub>2</sub> O <sub>2</sub>         | C <sub>12</sub> H <sub>10</sub> O <sub>2</sub>                                      |
| pK <sub>a</sub> 's | 4.66 (CO <sub>2</sub> H)                                                          | 2.80 (CO <sub>2</sub> H)                                                          | 3.56 (CO <sub>2</sub> H)                                                           | 16.23 (NH <sub>2</sub> )                                                            | 4.75 (CO <sub>2</sub> H)                                                            |
|                    | 16.19 (NH)                                                                        |                                                                                   |                                                                                    | 3.98 (CO <sub>2</sub> H)                                                            |                                                                                     |
|                    |                                                                                   |                                                                                   |                                                                                    | -0.21 (Pyr N)                                                                       |                                                                                     |
|                    |                                                                                   |                                                                                   |                                                                                    | -1.91 (NH)                                                                          |                                                                                     |
| clog P             | 1.76                                                                              | 2.37                                                                              | 2.79                                                                               | 1.79                                                                                | 2.68                                                                                |
| clog D             | 1.28 (pH 5.0)                                                                     | 0.19 (pH 5.0)                                                                     | 1.33 (pH 5.0)                                                                      | 0.72 (pH 5.0)                                                                       | 2.24 (pH 5.0)                                                                       |
|                    | 0.88 (pH 5.5)                                                                     | -0.28 (pH 5.5)                                                                    | 0.85 (pH 5.5)                                                                      | 0.25 (pH 5.5)                                                                       | 1.86 (pH 5.5)                                                                       |
|                    | 0.42 (pH 6.0)                                                                     | -0.70 (pH 6.0)                                                                    | 0.37 (pH 6.0)                                                                      | -0.24 (pH 6.0)                                                                      | 1.41 (pH 6.0)                                                                       |
|                    | -0.06 (pH 6.5)                                                                    | -1.01 (pH 6.5)                                                                    | -0.08 (pH 6.5)                                                                     | -0.71 (pH 6.5)                                                                      | 0.93 (pH 6.5)                                                                       |
|                    | -0.54 (pH 7.0)                                                                    | -1.19 (pH 7.0)                                                                    | -0.46 (pH 7.0)                                                                     | -1.15 (pH 7.0)                                                                      | 0.44 (pH 7.0)                                                                       |
|                    | -1.00 (pH 7.5)                                                                    | -1.27 (pH 7.5)                                                                    | -0.70 (pH 7.5)                                                                     | -1.51 (pH 7.5)                                                                      | -0.02 (pH 7.5)                                                                      |
| H-Bond Donor       | 2                                                                                 | 1                                                                                 | 1                                                                                  | 2                                                                                   | 1                                                                                   |
| H-Bond Acceptor    | 2                                                                                 | 5                                                                                 | 4                                                                                  | 7                                                                                   | 2                                                                                   |
