# Supplementary material
Source: PubMed Central journal article supplement (PMC2567513)

Table S1. List of all positive chemicals isolated in the primary screen

| ID      | Structure                                                                           |
|---------|-------------------------------------------------------------------------------------|
| 5133276 | 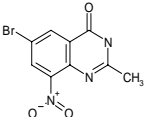   |
| 5169194 |    |
| 5237458 |    |
| 5305635 |    |
| 5320396 |  |
| 5353451 |  |
| 5357184 |  |
| 5403629 |  |
| 5403632 |  |

5403647

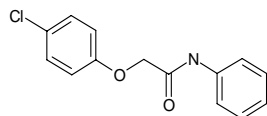

5429881

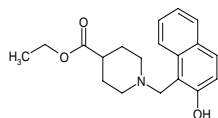

5526474

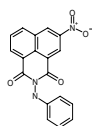

5530074

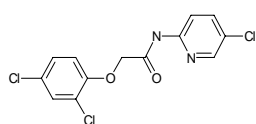

5572136

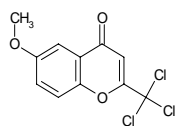

5629382

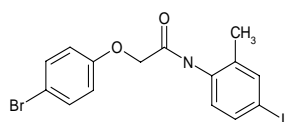

5632291

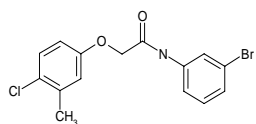

5687954

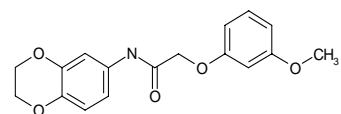

5743163

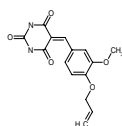

5796066

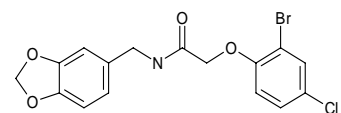

5809836

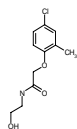

5838301

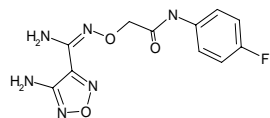

5839186

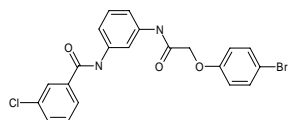

5839186

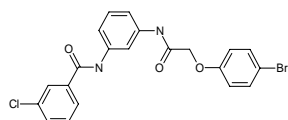

5842043

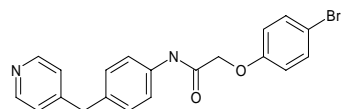

5856527

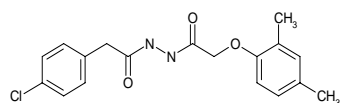

5869835

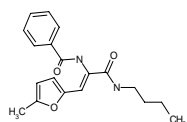

5925677

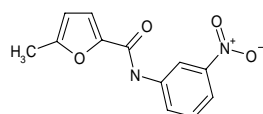

5940365

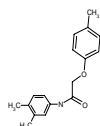

5946406

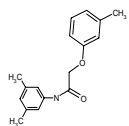

5968125

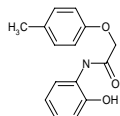

5968409

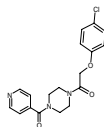

5969021

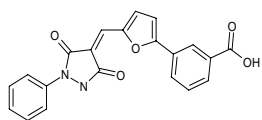

5972558

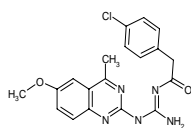

6007987

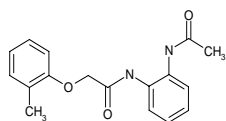

6009456

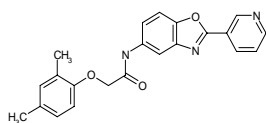

6011396

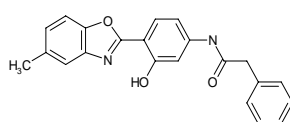

6011753

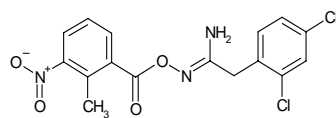

6012767

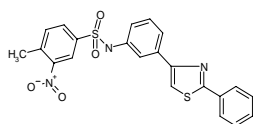

6013775

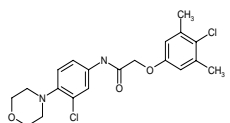

6016344

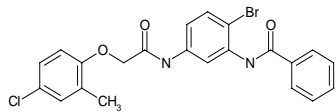

6016609

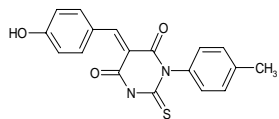

6021133

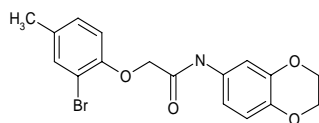

6027864

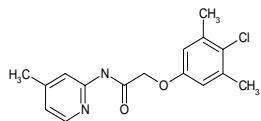

6028966

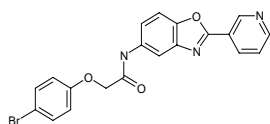

6030951

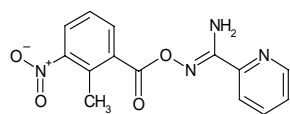

6033706

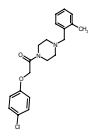

6042292

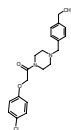

6067962

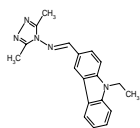

6070485

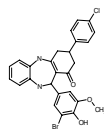

6081899

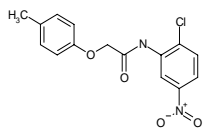

6085714

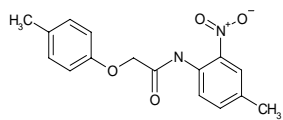

6088511

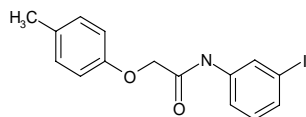

6088663

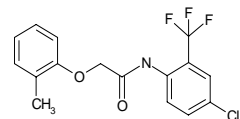

6088729

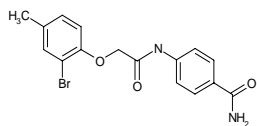

6093834

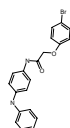

6097179

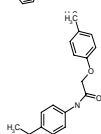

6097262

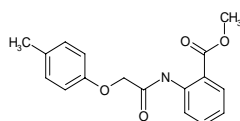

6098559

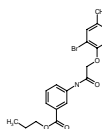

6104003

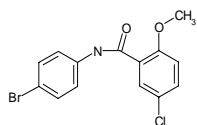

6114267

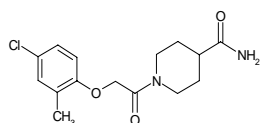

6121496

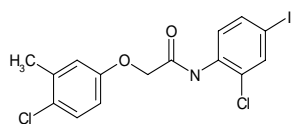

6123402

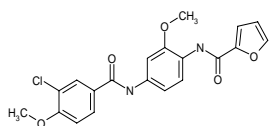

6123486

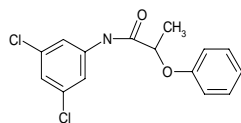

6127716

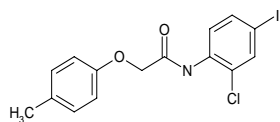

6135149

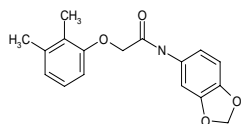

6139453

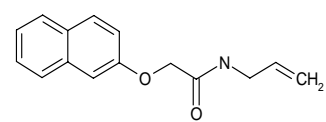

6142387

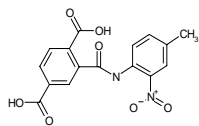

6143065

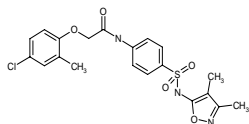

6147827

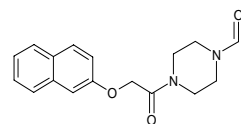

6152216

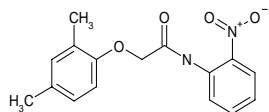

6153035

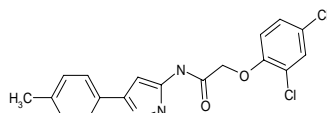

6159349

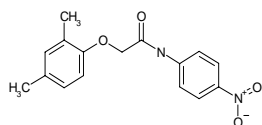

6159813

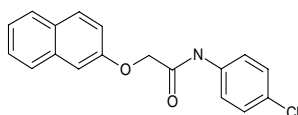

6160471

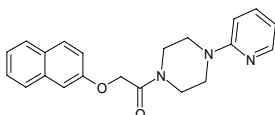

6161236

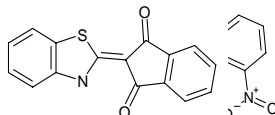

6162088

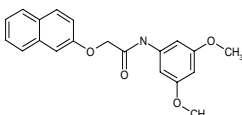

6162761

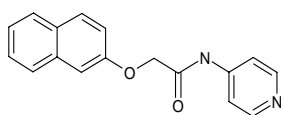

6163330

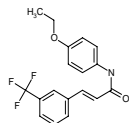

6163743

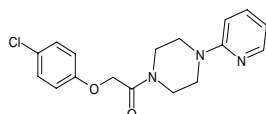

6166471

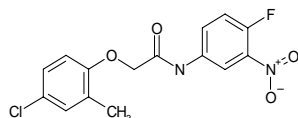



6169083

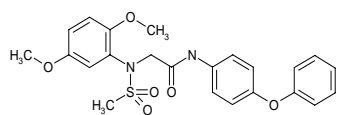

6170571

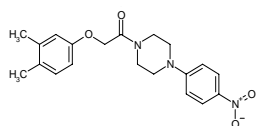

6172871

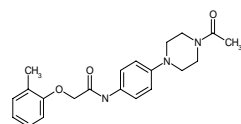

6176304

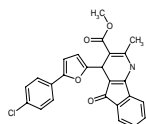

6178648

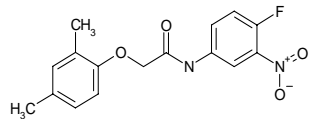

6180252

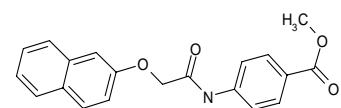

6187157

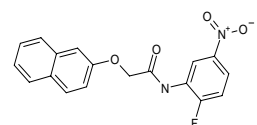

6191107

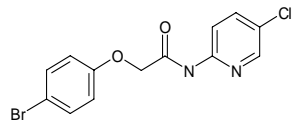

6193608

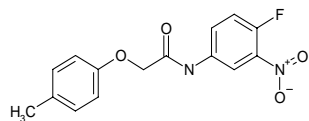

6201795

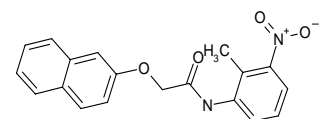

6206289

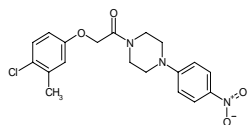

6215658

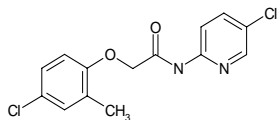

6223582

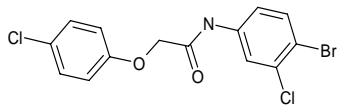

6224672

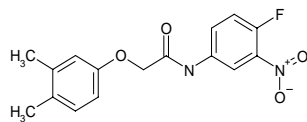

6229098

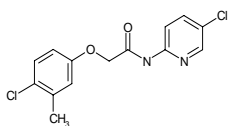

6239040

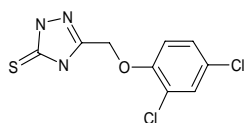

6239547

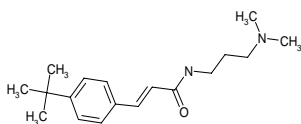

6239621

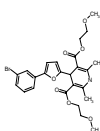

6240771

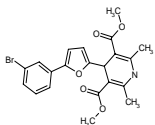

6241325

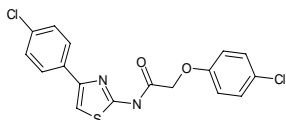

Supplement: 0806324105_ST1.pdf [file 0806324105_ST1.pdf]
